# Supplementary material for: Hyperbaric Oxygen Prevents Early Death Caused by Experimental Cerebral Malaria
Source: PLOS journal article supplement (doi:10.1371/journal.pone.0003126), 2008-09-03
Supplement: S1 (10.1371/journal.pone.0003126.s001) [file journal.pone.0003126.s001]

**Table S1. Lack of association between parasitemia levels and neuroprotection in HBO<sup>a</sup> exposed animals infected with PbA<sup>b</sup>.**

| Mice | Inhibition <sup>c</sup> (%)<br>Day 4 | Inhibition (%)<br>Day 5 | Inhibition (%)<br>Day 6 | CM neurological<br>symptoms <sup>d</sup> |
|------|--------------------------------------|-------------------------|-------------------------|------------------------------------------|
| #1   | 44,31                                | 35,06                   | 9,53                    | No                                       |
| #2   | 5,57                                 | 12,74                   | 23,69                   | Yes                                      |
| #3   | 62,71                                | 2,59                    | 15,82                   | Yes                                      |
| #4   | 18,64                                | 13,75                   | 12,67                   | No                                       |
| #5   | -11,38                               | 2,59                    | 19,76                   | No                                       |
| #6   | -28,33                               | 4,62                    | 22,9                    | No                                       |
| #7   | 22,52                                | 12,74                   | 26,05                   | No                                       |
| #8   | 22,52                                | 19,84                   | 11,10                   | Yes                                      |
| #9   | 63,68                                | 6,65                    | 25,26                   | Yes                                      |
| #10  | 22,52                                | 29,99                   | -36,99                  | Yes                                      |

<sup>a</sup> Animals were exposed to the 11-day exposure protocol .

<sup>b</sup> Mice were infected i.p. with 10<sup>6</sup> iRBC of *P. berghei* ANKA.

<sup>c</sup> Inhibition of parasitemia relative to non-exposed animals.

<sup>d</sup> All animals that presented CM neurological symptoms died on day 6-10 p.i..
